# Supplementary material
Source: Springer Nature journal article supplement (https://www.springermedizin.de/resource/supplementary/12889_2011_3845_MOESM5_ESM.pdf/9491062)
Supplement: MOESM5 [file 9491062]

Identified Article  
n=953

Excluded due to violation of basic  
inclusion criteria (e.g. country, disease,  
design, duplicate, etc.)  
n=872

Initial inclusion after review of abstracts  
n=81

Fulltext retrieval  
n=81

Dropped after critical appraisal (n=48)

- No full evaluation (n=20)
- No applied study (n=13)
- No data from developing countries (n=6)
- No CVD related endpoint (n=6)
- Other (n=3)

**Included evaluations  
n=33**
